# Supplementary material for: Neonatal Sepsis Episodes and Retinopathy of Prematurity in Very Preterm Infants
Source: PubMed Central journal article supplement (PMC11273231; doi:10.1001/jamanetworkopen.2024.23933), 2024-07-25
Supplement: jamanetwopen-e2423933-s001.pdf [file jamanetwopen-e2423933-s001.pdf]

## Supplemental Online Content

Glaser K, Härtel C, Klingenberg C, et al; for the German Neonatal Network and the Norwegian Neonatal Network Investigators. Neonatal sepsis episodes and retinopathy of prematurity in very preterm infants. *JAMA Netw Open*. 2024;7(7):e2423933. doi:10.1001/jamanetworkopen.2024.23933

**eFigure 1.** Study Flowchart of Infants Enrolled in the German Neonatal Network

**eFigure 2.** Study Flowchart of Infants Enrolled in the Norwegian Neonatal Network

**eFigure 3.** Variables Independently Associated With ROP in GNN in Stepwise Multivariable Regression Analyses

**eTable 1.** Multivariable Logistic Regression Modeling Testing for Association Between Neonatal Sepsis and Development of Any ROP in Very Preterm Infants in the GNN

**eTable 2.** Multivariable Logistic Regression Modeling Testing for Association Between Neonatal Sepsis and Development of Treatment-Warranted ROP in the GNN

**eMethods.** Description of Models Used in Analysis of Association With ROP and Treatment-Warranted ROP in GNN

This supplemental material has been provided by the authors to give readers additional information about their work.

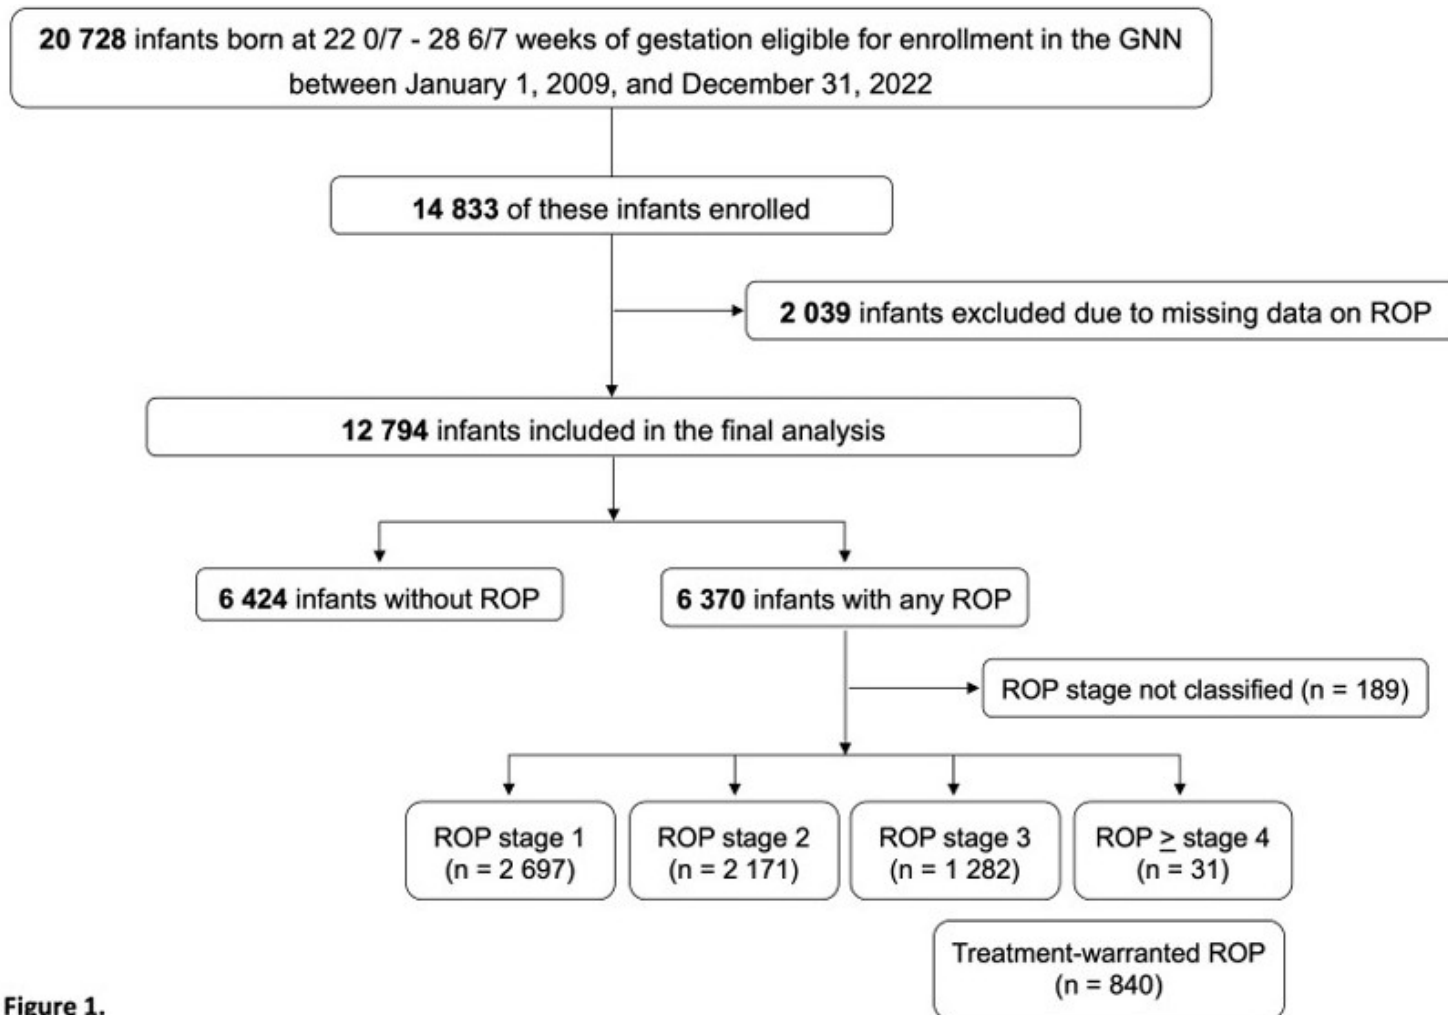

**Supplemental Figure 1.**  
**Study Flow Diagram of Infants Enrolled in the German Neonatal Network.**

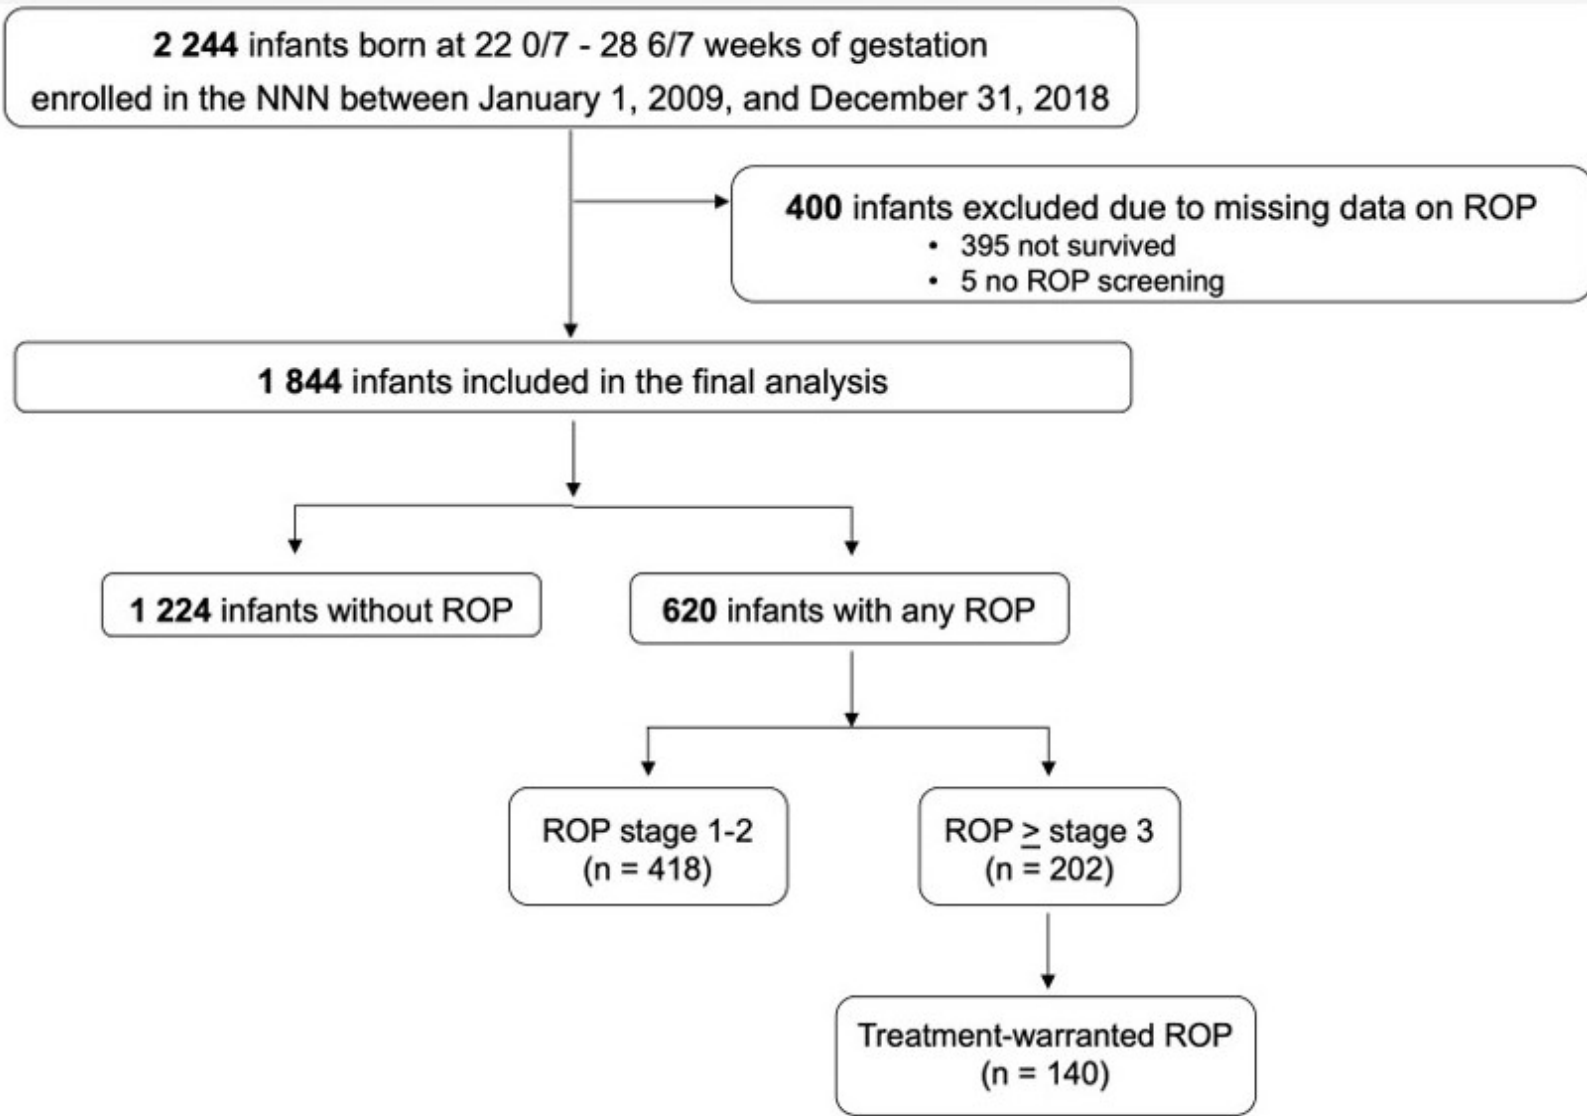

**Supplemental Figure 2.**  
**Study Flow Diagram of Infants Enrolled in the Norwegian Neonatal Network.**

**eFigure 3.** Variables Independently Associated with ROP in GNN in Stepwise Multivariable Regression Analyses

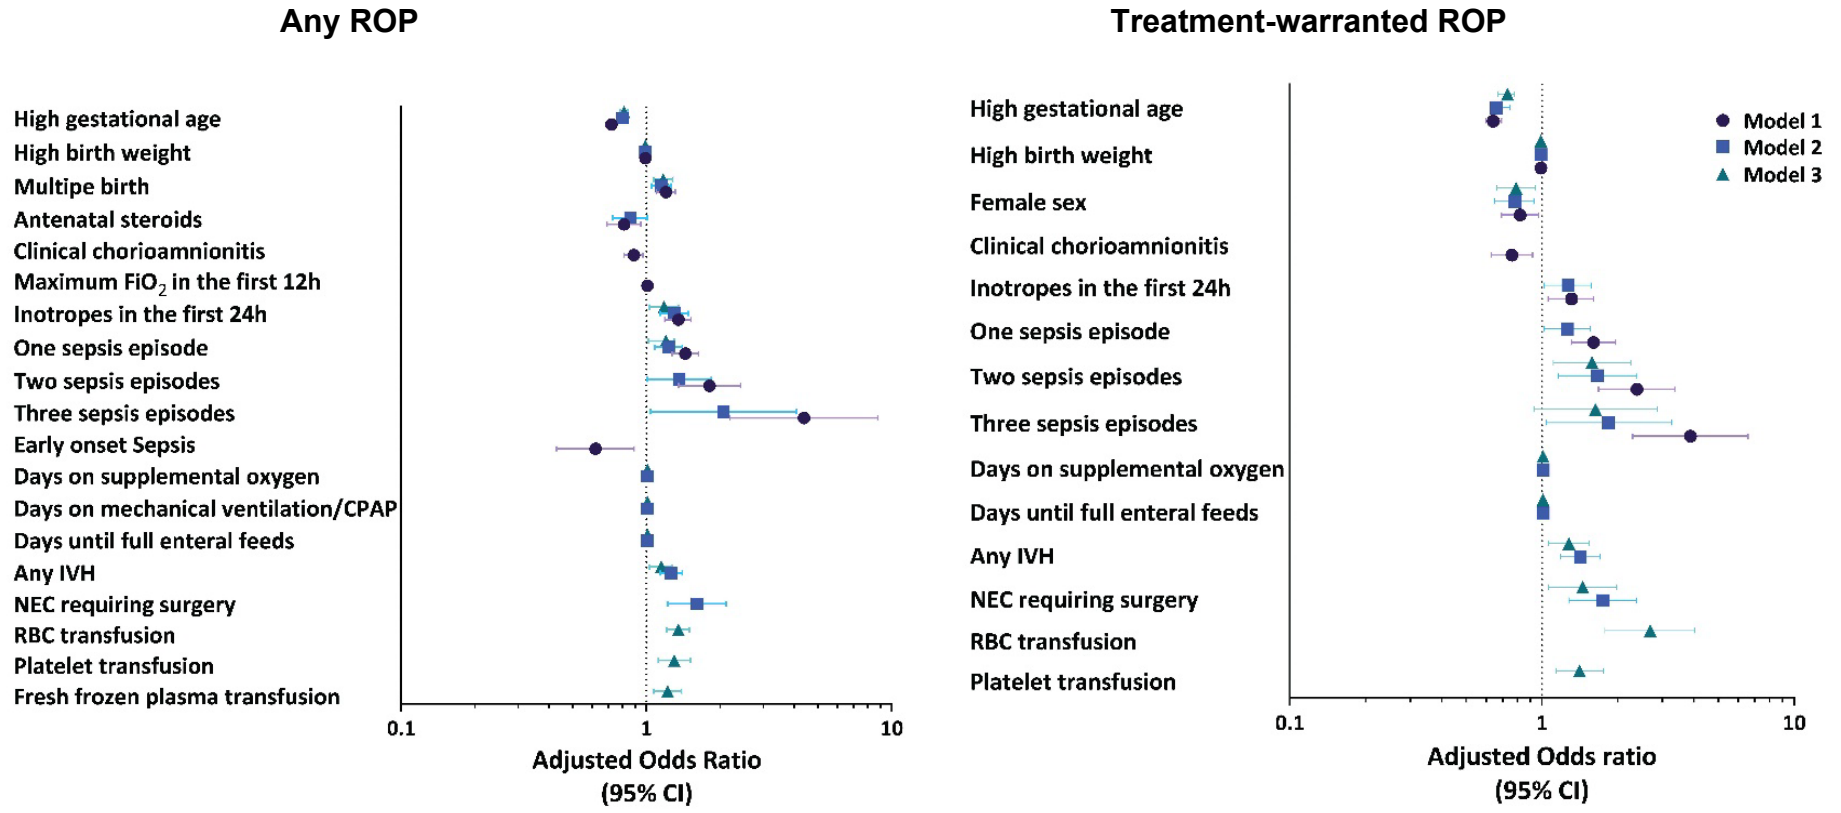

Multivariable logistic regression modelling testing for an association between neonatal sepsis and any ROP in infants enrolled in the GNN.

| Characteristic                                    | Model 1              |         | Model 2              |         | Model 3              |         |
|---------------------------------------------------|----------------------|---------|----------------------|---------|----------------------|---------|
|                                                   | Adjusted OR (95% CI) | p value | Adjusted OR (95% CI) | p value | Adjusted OR (95% CI) | p value |
| High gestational age                              | 0.72 (0.70 - 0.75)   | < .001  | 0.80 (0.77 - 0.83)   | < .001  | 0.81 (0.78 - 0.84)   | < .001  |
| High birth weight                                 | 0.99 (0.99 - 1.0)    | < .001  | 0.99 (0.99 - 1.0)    | < .001  | 0.99 (0.99 - 1.0)    | < .001  |
| Sex                                               | 0.98 (0.91 - 1.07)   | .68     | 1.09 (0.99 - 1.2)    | 0.1     |                      |         |
| Multiples birth                                   | 1.20 (1.10 - 1.31)   | < .001  | 1.15 (1.05 - 1.26)   | .003    | 1.17 (1.07 - 1.28)   | .001    |
| Inborn status                                     | 0.93 (0.72 - 1.20)   | .57     |                      |         |                      |         |
| Antenatal steroids                                | 0.81 (0.69 - 0.95)   | .01     | 0.86 (0.73 - 1.01)   | .05     | 0.87 (0.74 - 1.02)   | .09     |
| Clinical chorioamnionitis                         | 0.89 (0.81 - 0.97)   | .01     | 0.95 (0.86 - 1.04)   | .27     |                      |         |
| Apgar score at 5 min, mean (SD)                   | 0.99 (0.96 - 1.02)   | .47     |                      |         |                      |         |
| Surfactant replacement via LISA                   | 1.02 (0.94 - 1.11)   | .66     |                      |         |                      |         |
| Maximum FiO <sub>2</sub> in the first 12h of life | 1.01 (1.0 - 1.01)    | < .001  | 1.01 (1.0 - 1.01)    | .09     | 1.01 (1.01 - 1.02)   | .13     |
| Inotropes given in the first 24h                  | 1.35 (1.19 - 1.52)   | < .001  | 1.30 (1.14 - 1.48)   | < .001  | 1.18 (1.03 - 1.35)   | .02     |
| Number of sepsis episodes                         |                      | < .001  |                      | .001    |                      |         |
| One sepsis episode                                | 1.44 (1.27 - 1.63)   | < .001  | 1.23 (1.08 - 1.40)   | .002    | 1.20 (1.02 - 1.30)   | .05     |
| Two sepsis episodes                               | 1.81 (1.35 - 2.42)   | < .001  | 1.36 (1.01 - 1.84)   | .05     | 1.27 (0.94 - 1.71)   | .12     |
| Three sepsis episodes                             | 4.39 (2.19 - 8.78)   | < .001  | 2.06 (1.04 - 4.10)   | .04     | 1.89 (0.96 - 3.75)   | .07     |
| Early onset Sepsis                                | 0.62 (0.43 - 0.89)   | .01     | 0.78 (0.53 - 1.13)   | .19     |                      |         |
| Days on supplemental oxygen                       |                      |         | 1.01 (1.0 - 1.01)    | < .001  | 1.01 (1.0 - 1.01)    | < .001  |
| Days on mechanical ventilation or CPAP            |                      |         | 1.01 (1.0 - 1.01)    | < .001  | 1.01 (1.0 - 1.01)    | < .001  |
| Time to achieve full enteral feeding              |                      |         | 1.01 (1.01 - 1.02)   | < .001  | 1.01 (1.0 - 1.01)    | < .001  |
| Any ICH                                           |                      |         | 1.26 (1.14 - 1.40)   | < .001  | 1.15 (1.03 - 1.27)   | .01     |
| NEC requiring surgery                             |                      |         | 1.61 (1.22 - 2.11)   | .001    | 1.28 (0.97 - 1.70)   | .08     |
| RBC transfusion                                   |                      |         |                      |         | 1.35 (1.21 - 1.50)   | < .001  |
| Platelet transfusion                              |                      |         |                      |         | 1.30 (1.12 - 1.51)   | .001    |
| Fresh frozen plasma transfusion                   |                      |         |                      |         | 1.22 (1.07 - 1.39)   | .002    |

Abbreviations: CPAP, continuous positive airway pressure; cPVL, cystic periventricular leukomalacia; IVH, intraventricular hemorrhage; NEC, necrotizing enterocolitis; SGA, small for gestational age.

Multivariable logistic regression modelling testing for an association between neonatal sepsis and treatment-warranted ROP in GNN infants.

| Characteristic                                    | Model 1                 |         | Model 2                 |         | Model 3                 |         |
|---------------------------------------------------|-------------------------|---------|-------------------------|---------|-------------------------|---------|
|                                                   | Adjusted OR<br>(95% CI) | p value | Adjusted OR<br>(95% CI) | p value | Adjusted OR<br>(95% CI) | p value |
| High gestational age                              | 0.64 (0.60 - 0.69)      | < .001  | 0.66 (0.64 - 0.75)      | < .001  | 0.73 (0.67 - 0.78)      | < .001  |
| High birth weight                                 | 0.99 (0.99 - 1.0)       | < .001  | 0.99 (0.99 - 1.0)       | < .001  | 0.99 (0.99 - 1.0)       | < .001  |
| Sex                                               | 0.82 (0.69 - 0.97)      | .02     | 0.78 (0.65 - 0.93)      | .005    | 0.79 (0.66 - 0.94)      | .008    |
| Multiple birth                                    | 0.88 (0.73 - 1.05)      | .16     |                         |         |                         |         |
| Inborn status                                     | 0.99 (0.61 - 1.63)      | .99     |                         |         |                         |         |
| Antenatal steroids                                | 1.14 (0.84 - 1.53)      | .4      |                         |         |                         |         |
| Clinical chorioamnionitis                         | 0.76 (0.63 - 0.92)      | .004    | 0.86 (0.71 - 1.04)      | .12     |                         |         |
| Apgar score at 5 min, mean (SD)                   | 0.98 (0.93 - 1.03)      | .38     |                         |         |                         |         |
| Surfactant replacement via LISA                   | 0.84 (0.70 - 1.01)      | .05     | 0.88 (0.73 - 1.05)      | .16     |                         |         |
| Maximum FiO <sub>2</sub> in the first 12h of life | 1.01 (0.99 - 1.01)      | .15     | 1.01 (0.99 - 1.01)      | .34     |                         |         |
| Inotropes given in the first 24h                  | 1.31 (1.06 - 1.60)      | .01     | 1.27 (1.02 - 1.57)      | .03     | 1.15 (0.93 - 1.42)      | .20     |
| Number of sepsis episodes                         |                         | < .001  |                         | .004    |                         | .03     |
| One sepsis episode                                | 1.60 (1.31 - 1.96)      | < .001  | 1.26 (1.02 - 1.55)      | .03     | 1.14 (0.92 - 1.40)      | .24     |
| Two sepsis episodes                               | 2.38 (1.68 - 3.37)      | < .001  | 1.66 (1.16 - 2.38)      | .006    | 1.58 (1.11 - 2.25)      | .01     |
| Three sepsis episodes                             | 3.88 (2.29 - 6.55)      | < .001  | 1.84 (1.04 - 3.27)      | .04     | 1.63 (0.93 - 2.87)      | .09     |
| Early onset sepsis                                | 0.88 (0.50 - 1.56)      | .66     |                         |         |                         |         |
| Days on supplemental oxygen                       |                         |         | 1.01 (1.0 - 1.01)       | < .001  | 1.01 (1.0 - 1.01)       | < .001  |
| Days on mechanical ventilation or CPAP            |                         |         | 1.01 (0.99 - 1.01)      | .80     |                         |         |
| Time to achieve full enteral feeding              |                         |         | 1.01 (1.00 - 1.01)      | .001    | 1.01 (0.99 - 1.01)      | .10     |
| Any ICH                                           |                         |         | 1.42 (1.19 - 1.70)      | < .001  | 1.28 (1.06 - 1.54)      | .009    |
| NEC requiring surgery                             |                         |         | 1.74 (1.28 - 2.37)      | < .001  | 1.45 (1.06 - 1.98)      | .02     |
| RBC transfusion                                   |                         |         |                         |         | 2.69 (1.78 - 4.05)      | < .001  |
| Platelet transfusion                              |                         |         |                         |         | 1.41 (1.14 - 1.75)      | .001    |
| Fresh frozen plasma transfusion                   |                         |         |                         |         | 1.20 (0.98 - 1.47)      | .08     |

Abbreviations: CPAP, continuous positive airway pressure; cPVL, cystic periventricular leukomalacia; IVH, intraventricular hemorrhage; NEC, necrotizing enterocolitis; SGA, small for gestational age.

**eMethods.** Description of Models Used in Analysis of Association with ROP and Treatment-Warranted ROP in GNN

**Model 1:** Multivariable logistic regression analysis included gestational age, birth weight, female sex, multiple birth, inborn status, antenatal steroids, clinical chorioamnionitis, Apgar score at 5min, LISA, maximum FiO<sub>2</sub> in the first 12h of life, inotropes in the first 24h, and sepsis episodes as independent variables.

**Model 2:** Covariates offered to this model were those variables significant at  $P < .10$  in preceding model 1 (*Any ROP*: gestational age, birth weight, multiple birth, antenatal steroids, clinical chorioamnionitis, maximum FiO<sub>2</sub> in the first 12h, inotropes in the first 24h, early onset sepsis, number of sepsis episodes. *Treatment-warranted ROP*: gestational age, birth weight, female sex, clinical chorioamnionitis, LISA, maximum FIO<sub>2</sub> in the first 12h, inotropes given in the first 24h, number of sepsis episodes), plus surrogate markers of poor clinical course comprising days on supplemental oxygen, days on ventilation or CPAP, days until full enteral feeds, any IVH, and NEC requiring surgery.

**Model 3:** Analyses included all variables significant at  $P < .10$  in preceding model 2 (*Any ROP*: gestational age, birth weight, multiple birth, antenatal steroids, maximum FiO<sub>2</sub> in the first 12h, inotropes in the first 24h, number of sepsis episodes, days on supplemental oxygen, days on ventilation or CPAP, days until full enteral feeds, any IVH, and NEC requiring surgery. *Treatment-warranted ROP*: gestational age, birth weight, female sex, inotropes in the first 24h, number of sepsis episodes, days on supplemental oxygen, any IVH, and NEC requiring surgery), plus, red blood cell transfusions, platelet transfusions, and fresh frozen plasma transfusions.

Alternatively, we excluded the variable birth weight from models 1, 2, and 3. Results obtained from these analyses did not differ from the presented analyses including GA and birth weight.
