# Supplementary material for: Neonatal Sepsis Episodes and Retinopathy of Prematurity in Very Preterm Infants
Source: PubMed Central journal article supplement (PMC11273231; doi:10.1001/jamanetworkopen.2024.23933), 2024-07-25
Supplement: jamanetwopen-e2423933-s002.pdf [file jamanetwopen-e2423933-s002.pdf]

| <b>*Group Name(s): German Neonatal Network and Norwegian Neonatal Network Investigators</b> |                   |                              |                         |                                                                                                   |                                                 |                                                                |                                                                                                   |
|---------------------------------------------------------------------------------------------|-------------------|------------------------------|-------------------------|---------------------------------------------------------------------------------------------------|-------------------------------------------------|----------------------------------------------------------------|---------------------------------------------------------------------------------------------------|
| <b>*First Name and Middle Initial(s)</b>                                                    | <b>*Last Name</b> | <b>*Suffix (eg, Jr, III)</b> | <b>Academic Degrees</b> | <b>Institution</b>                                                                                | <b>Location (city, state/province, country)</b> | <b>Role or Contribution, eg, chair, principal investigator</b> | <b>Group (if more than 1 Group listed in the byline) and/or Subgroup (eg, Steering Committee)</b> |
| Kirstin                                                                                     | Faust             |                              | MD                      | Klinik für Kinder- und Jugendmedizin, UKSH Campus Lübeck                                          | Lübeck                                          | site investigator, patient enrollment                          | German Neonatal Network                                                                           |
| Dirk                                                                                        | Müller            |                              | MD                      | Klinikum Kassel, Kinderklinik - Neonatologie                                                      | Kassel                                          | site investigator, patient enrollment                          | German Neonatal Network                                                                           |
| Ulrich                                                                                      | Thome             |                              | MD                      | Universitätsklinikum Leipzig, Klinik für Kinder und Jugendliche                                   | Leipzig                                         | site investigator, patient enrollment                          | German Neonatal Network                                                                           |
| Florian                                                                                     | Guthmann          |                              | MD                      | Kinderkrankenhaus auf der Bult                                                                    | Hannover                                        | site investigator, patient enrollment                          | German Neonatal Network                                                                           |
| Axel                                                                                        | von der Wense     |                              | MD                      | Altonaer Kinderkrankenhaus e.V.                                                                   | Hamburg                                         | site investigator, patient enrollment                          | German Neonatal Network                                                                           |
| Christian                                                                                   | Wieg              |                              | MD                      | Klinikum Aschaffenburg-Alzenau, Klinik für Kinder- und Jugendmedizin                              | Aschaffenburg                                   | site investigator, patient enrollment                          | German Neonatal Network                                                                           |
| Ursula                                                                                      | Weller            |                              | MD                      | Evangelisches Krankenhaus Bielefeld, Klinik für Kinder- und Jugendmedizin                         | Bielefeld                                       | site investigator, patient enrollment                          | German Neonatal Network                                                                           |
| Thomas                                                                                      | Höhn              |                              | MD                      | Universität Düsseldorf, Klinik für Allgemeine Pädiatrie                                           | Düsseldorf                                      | site investigator, patient enrollment                          | German Neonatal Network                                                                           |
| Dirk                                                                                        | Olbertz           |                              | MD                      | Klinikum Südstadt Rostock, Abteilung für Neonatologie                                             | Rostock                                         | site investigator, patient enrollment                          | German Neonatal Network                                                                           |
| Ursula                                                                                      | Felderhoff-Müser  |                              | MD                      | Universitätskinderklinik Essen                                                                    | Essen                                           | site investigator, patient enrollment                          | German Neonatal Network                                                                           |
| Rainer                                                                                      | Rossi             |                              | MD                      | Vivantes Krankenhaus Neukölln, Kinder- und Jugendmedizin                                          | Berlin                                          | site investigator, patient enrollment                          | German Neonatal Network                                                                           |
| Norbert                                                                                     | Teig              |                              | MD                      | St. Elisabeth-Hospital, Klinikum der Ruhr-Universität Bochum, Klinik für Kinder und Jugendmedizin | Bochum                                          | site investigator, patient enrollment                          | German Neonatal Network                                                                           |
| Friedhelm                                                                                   | Heitmann          |                              | MD                      | Klinikum Dortmund, Klinik für Kinder- und Jugendmedizin                                           | Dortmund                                        | site investigator, patient enrollment                          | German Neonatal Network                                                                           |

| *First Name and Middle Initial(s) | *Last Name | *Suffix (eg, Jr, III) | Academic Degrees | Institution                                                                                                                           | Location (city, state/province, country) | Role or Contribution, eg, chair, principal investigator | Group (if more than 1 Group listed in the byline) and/or Subgroup (eg, Steering Committee) |
|-----------------------------------|------------|-----------------------|------------------|---------------------------------------------------------------------------------------------------------------------------------------|------------------------------------------|---------------------------------------------------------|--------------------------------------------------------------------------------------------|
| Matthias                          | Heckmann   |                       | MD               | Ernst-Moritz-Arndt-Universität, Klinik & Poliklinik für Kinder- und Jugendmedizin                                                     | Greifswald                               | site investigator, patient enrollment                   | German Neonatal Network                                                                    |
| Susanne                           | Schmidtke  |                       | MD               | Asklepios Klinik Barmbek, Neonatologie                                                                                                | Hamburg                                  | site investigator, patient enrollment                   | German Neonatal Network                                                                    |
| Bettina                           | Bohnhorst  |                       | MD               | Medizinische Hochschule Hannover, Kinderklinik I                                                                                      | Hannover                                 | site investigator, patient enrollment                   | German Neonatal Network                                                                    |
| Angela                            | Kribs      |                       | MD               | Klinikum der Universität zu Köln, Klinik und Poliklinik für Allgemeine Kinderheilkunde, Neonatologie und Pädiatrische Intensivmedizin | Köln                                     | site investigator, patient enrollment                   | German Neonatal Network                                                                    |
| Matthias                          | Vochem     |                       | MD               | Olgahospital Stuttgart, Klinik für Kinder- und Jugendmedizin                                                                          | Stuttgart                                | site investigator, patient enrollment                   | German Neonatal Network                                                                    |
| Sven                              | Wellmann   |                       | MD               | Kinderklinik St. Hedwig                                                                                                               | Regensburg                               | site investigator, patient enrollment                   | German Neonatal Network                                                                    |
| Jens                              | Möller     |                       | MD               | Klinikum Saarbrücken gGmbH, Klinik für Kinder- und Jugendmedizin                                                                      | Saarbrücken                              | site investigator, patient enrollment                   | German Neonatal Network                                                                    |
| Joachim                           | Eichhorn   |                       | MD               | Klinikum Leverkusen, Klinik für Kinder und Jugendliche                                                                                | Leverkusen                               | site investigator, patient enrollment                   | German Neonatal Network                                                                    |
| Jürgen                            | Wintgens   |                       | MD               | Städtische Kliniken Mönchengladbach GmbH                                                                                              | Mönchengladbach                          | site investigator, patient enrollment                   | German Neonatal Network                                                                    |
| Ralf                              | Böttger    |                       | MD               | Universitätskinderklinik Magdeburg, Perinatalzentrum                                                                                  | Magdeburg                                | site investigator, patient enrollment                   | German Neonatal Network                                                                    |
| Markus                            | Flügel     |                       | MD               | Ostholstein Kliniken, Kinderklinik Eutin                                                                                              | Eutin                                    | site investigator, patient enrollment                   | German Neonatal Network                                                                    |
| Mechthild                         | Hubert     |                       | MD               | DRK-Kinderklinik Siegen, Pädiatrie                                                                                                    | Siegen                                   | site investigator, patient enrollment                   | German Neonatal Network                                                                    |
| Michael                           | Dördelmann |                       | MD               | Diakonissenkrankenhaus, Klinik für Kinder- u. Jugendmedizin                                                                           | Flensburg                                | site investigator, patient enrollment                   | German Neonatal Network                                                                    |
| Georg                             | Hillebrand |                       | MD               | Klinikum Itzehoe, Kinderklinik                                                                                                        | Itzehoe                                  | site investigator, patient enrollment                   | German Neonatal Network                                                                    |

| *First Name and Middle Initial(s) | *Last Name | *Suffix (eg, Jr, III) | Academic Degrees | Institution                                                                             | Location (city, state/province, country) | Role or Contribution, eg, chair, principal investigator | Group (if more than 1 Group listed in the byline) and/or Subgroup (eg, Steering Committee) |
|-----------------------------------|------------|-----------------------|------------------|-----------------------------------------------------------------------------------------|------------------------------------------|---------------------------------------------------------|--------------------------------------------------------------------------------------------|
| Claudia                           | Roll       |                       | MD               | Universität Witten/Herdecke, Vestischen Kinder- und Jugendklinik Datteln                | Datteln                                  | site investigator, patient enrollment                   | German Neonatal Network                                                                    |
| Reinhard                          | Jensen     |                       | MD               | Westküstenklinikum Heide, Klinik für Kinder- u. Jugendmedizin                           | Heide                                    | site investigator, patient enrollment                   | German Neonatal Network                                                                    |
| Jens                              | Möller     |                       | MD               | Kinderklinik Saarbrücken                                                                | Saarbrücken                              | site investigator, patient enrollment                   | German Neonatal Network                                                                    |
| Mario                             | Rüdiger    |                       | MD               | Universitätsklinikum Carl Gustav Carus, Neonatologie u. Intensivmedizin                 | Dresden                                  | site investigator, patient enrollment                   | German Neonatal Network                                                                    |
| Alexander                         | Humberg    |                       | MD               | Kinderklinik der Westfälische Wilhelms-Universität Münster                              | Münster                                  | site investigator, patient enrollment                   | German Neonatal Network                                                                    |
| Ann Carolin                       | Longardt   |                       | MD               | UKSH Campus Kiel, Klinik für Allgemeine Pädiatrie                                       | Kiel                                     | site investigator, patient enrollment                   | German Neonatal Network                                                                    |
| Stefan                            | Schäfer    |                       | MD               | Klinikum Nürnberg Süd, Zentrum für Neugeborene, Kinder u. Jugendliche                   | Nürnberg                                 | site investigator, patient enrollment                   | German Neonatal Network                                                                    |
| Thomas                            | Schaible   |                       | MD               | Klinikum Mannheim, Kinderklinik                                                         | Mannheim                                 | site investigator, patient enrollment                   | German Neonatal Network                                                                    |
| Axel                              | Franz      |                       | MD               | Universitätsklinik für Kinder- und Jugendmedizin Tübingen, Abtlg. Neonatologie          | Tübingen                                 | site investigator, patient enrollment                   | German Neonatal Network                                                                    |
| Kay                               | Hensel     |                       | MD               | Helios Klinik Wuppertal, Zentrum für Kinder und Jugendmedizin, Neonatologie             | Wuppertal                                | site investigator, patient enrollment                   | German Neonatal Network                                                                    |
| Steffen                           | Kunzmann   |                       | MD               | Bürgerhospital, Verein Frankfurter Stiftungskrankenhäuser, Neonatologie                 | Frankfurt                                | site investigator, patient enrollment                   | German Neonatal Network                                                                    |
| Esther                            | Schmidt    |                       | MD               | HELIOS Klinik Schwerin                                                                  | Schwerin                                 | site investigator, patient enrollment                   | German Neonatal Network                                                                    |
| Thorsten                          | Orlikowsky |                       | MD               | Universitätsklinikum Aachen, Klinik für Kinder- und Jugendmedizin, Sektion Neonatologie | Aachen                                   | site investigator, patient enrollment                   | German Neonatal Network                                                                    |

| *First Name and Middle Initial(s) | *Last Name | *Suffix (eg, Jr, III) | Academic Degrees | Institution                                                                                                                | Location (city, state/province, country) | Role or Contribution, eg, chair, principal investigator | Group (if more than 1 Group listed in the byline) and/or Subgroup (eg, Steering Committee) |
|-----------------------------------|------------|-----------------------|------------------|----------------------------------------------------------------------------------------------------------------------------|------------------------------------------|---------------------------------------------------------|--------------------------------------------------------------------------------------------|
| Hubert                            | Gerleve    |                       | MD               | St. Vinzenzhospital, Kinder- und Jugendklinik                                                                              | Coesfeld                                 | site investigator, patient enrollment                   | German Neonatal Network                                                                    |
| Nico                              | Depping    |                       | MD               | St. Marienhospital Bonn                                                                                                    | Bonn                                     | site investigator, patient enrollment                   | German Neonatal Network                                                                    |
| Roland                            | Haase      |                       | MD               | Universitätsklinikum Halle, Poliklinik für Kinder- und Jugendmedizin                                                       | Halle (Saale)                            | site investigator, patient enrollment                   | German Neonatal Network                                                                    |
| Marc                              | Hoppenz    |                       | MD               | Kliniken der Stadt Köln, Kinderkrankenhaus Amsterdamer Straße - Neonatologie                                               | Köln                                     | site investigator, patient enrollment                   | German Neonatal Network                                                                    |
| Daniel                            | Vilser     |                       | MD               | Klinikum St. Elisabeth, Klinik für Kinder- und Jugendmedizin                                                               | Neuburg/Donau                            | site investigator, patient enrollment                   | German Neonatal Network                                                                    |
| Helmut                            | Küster     |                       | MD               | Georg-August-Universität Göttingen, Pädiatrische Kardiologie und Intensivmedizin                                           | Göttingen                                | site investigator, patient enrollment                   | German Neonatal Network                                                                    |
| Hans                              | Fuchs      |                       | MD               | Universitätsklinikum Freiburg, Zentrum für Kinder- u. Jugendmedizin Neonatologie / intensivmedizin                         | Freiburg                                 | site investigator, patient enrollment                   | German Neonatal Network                                                                    |
| Thorsten                          | Körner     |                       | MD               | Klinikum Links der Weser GmbH, Klinik für Kinder- und Jugendmedizin, Abt. f. Neonatologie und Pädiatrische Intensivmedizin | Bremen                                   | site investigator, patient enrollment                   | German Neonatal Network                                                                    |
| Thomas                            | Brune      |                       | MD               | Klinikum Lippe GmbH, Klinik für Kinder- und Jugendmedizin                                                                  | Detmold                                  | site investigator, patient enrollment                   | German Neonatal Network                                                                    |
| Andreas                           | Müller     |                       | MD               | Universitätsklinikum Bonn (AöR), Zentrum für Kinderheilkunde                                                               | Bonn                                     | site investigator, patient enrollment                   | German Neonatal Network                                                                    |
| Florian                           | Urlichs    |                       | MD               | St. Franziskus-Hospital Münster, Neonatologie und Kinderintensivmedizin                                                    | Münster                                  | site investigator, patient enrollment                   | German Neonatal Network                                                                    |
| Martin                            | Berghäuser |                       | MD               | Florence-Nightingale Krankenhaus, Kinderklinik / Neonatologie und Päd. Intensivmedizin                                     | Düsseldorf                               | site investigator, patient enrollment                   | German Neonatal Network                                                                    |

| *First Name and Middle Initial(s) | *Last Name       | *Suffix (eg, Jr, III) | Academic Degrees | Institution                                                                                                       | Location (city, state/province, country) | Role or Contribution, eg, chair, principal investigator | Group (if more than 1 Group listed in the byline) and/or Subgroup (eg, Steering Committee) |
|-----------------------------------|------------------|-----------------------|------------------|-------------------------------------------------------------------------------------------------------------------|------------------------------------------|---------------------------------------------------------|--------------------------------------------------------------------------------------------|
| Hans                              | Proquitté        |                       | MD               | Universitätsklinikum Jena, Klinik für Kinder- und Jugendmedizin, Sektion Neonatologie                             | Jena                                     | site investigator, patient enrollment                   | German Neonatal Network                                                                    |
| Patrick                           | Morhart          |                       | MD               | Universitätsklinikum Erlangen, Neonatologie                                                                       | Erlangen                                 | site investigator, patient enrollment                   | German Neonatal Network                                                                    |
| Wolfgang                          | Lindner          |                       | MD               | Universitätsklinikum Ulm, Klinik für Kinder- und Jugendmedizin                                                    | Ulm                                      | site investigator, patient enrollment                   | German Neonatal Network                                                                    |
| Rolf                              | Schlösser        |                       | MD               | Universitätsklinik Frankfurt                                                                                      | Frankfurt                                | site investigator, patient enrollment                   | German Neonatal Network                                                                    |
| Welfhard                          | Schneider        |                       | MD               | Vivantes Klinikum am Friedrichshain                                                                               | Berlin                                   | site investigator, patient enrollment                   | German Neonatal Network                                                                    |
| Michael                           | Schroth          |                       | MD               | Cnopf'sche Kinderklinik Nürnberg                                                                                  | Nürnberg                                 | site investigator, patient enrollment                   | German Neonatal Network                                                                    |
| Esther                            | Rieger-Fackeldey |                       | MD               | Klinikum rechts der Isar der Technischen Universität München; Abteilung für Neonatologie und Päd. Intensivmedizin | München                                  | site investigator, patient enrollment                   | German Neonatal Network                                                                    |
| Frank                             | Dohle            |                       | MD               | St. Vincenz-Krankenhaus Paderborn Klinik für Kinder- und Jugendmedizin                                            | Paderborn                                | site investigator, patient enrollment                   | German Neonatal Network                                                                    |
| Jaqueline                         | Bauer            |                       | MD               | Klinikum Wolfsburg                                                                                                | Wolfsburg                                | site investigator, patient enrollment                   | German Neonatal Network                                                                    |
| Florian                           | Urlichs          |                       | MD               | Christliches Kinderhospital Osnabrück GmbH Zentrum für Kinder- und Jugendmedizin                                  | Osnabrück                                | site investigator, patient enrollment                   | German Neonatal Network                                                                    |
| Thomas                            | Völkl            |                       | MD               | Klinik für Kinder und Jugendliche Josefinum Augsburg                                                              | Augsburg                                 | site investigator, patient enrollment                   | German Neonatal Network                                                                    |
| Francisco                         | Brevis Nunez     |                       | MD               | Sana Kliniken Duisburg GmbH                                                                                       | Duisburg                                 | site investigator, patient enrollment                   | German Neonatal Network                                                                    |
| Michael                           | Welsch           |                       | MD               | DONAUISAR Klinikum                                                                                                | Deggendorf                               | site investigator, patient enrollment                   | German Neonatal Network                                                                    |

## Supplemental Online Material: Nonauthor Collaborators

| *First Name and Middle Initial(s) | *Last Name | *Suffix (eg, Jr, III) | Academic Degrees | Institution                             | Location (city, state/province, country) | Role or Contribution, eg, chair, principal investigator | Group (if more than 1 Group listed in the byline) and/or Subgroup (eg, Steering Committee) |
|-----------------------------------|------------|-----------------------|------------------|-----------------------------------------|------------------------------------------|---------------------------------------------------------|--------------------------------------------------------------------------------------------|
| Marcus                            | Krüger     |                       | MD               | München Klinik Harlaching               | München Harlaching                       | site investigator, patient enrollment                   | German Neonatal Network                                                                    |
|                                   |            |                       |                  | Oslo University Hospital-Rikshospitalet | Oslo                                     |                                                         | Norwegian Neonatal Network                                                                 |
|                                   |            |                       |                  | Oslo University Hospital-Ullevål        | Oslo                                     |                                                         | Norwegian Neonatal Network                                                                 |
|                                   |            |                       |                  | Akershus University Hospital            | Lørenskog                                |                                                         | Norwegian Neonatal Network                                                                 |
|                                   |            |                       |                  | Drammen Hospital                        | Drammen                                  |                                                         | Norwegian Neonatal Network                                                                 |
|                                   |            |                       |                  | Østfold Hospital Trust                  | Kalnes                                   |                                                         | Norwegian Neonatal Network                                                                 |
|                                   |            |                       |                  | Innlandet Hospital Trust                | Lillehammer                              |                                                         | Norwegian Neonatal Network                                                                 |
|                                   |            |                       |                  | Innlandet Hospital Trust                | Elverum                                  |                                                         | Norwegian Neonatal Network                                                                 |
|                                   |            |                       |                  | Telemark Health Trust                   | Skien                                    |                                                         | Norwegian Neonatal Network                                                                 |
|                                   |            |                       |                  | Hospital of Southern Norway             | Kristiansand                             |                                                         | Norwegian Neonatal Network                                                                 |
|                                   |            |                       |                  | Hospital of Southern Norway             | Arendal                                  |                                                         | Norwegian Neonatal Network                                                                 |
|                                   |            |                       |                  | Stavanger University Hospital           | Stavanger                                |                                                         | Norwegian Neonatal Network                                                                 |
|                                   |            |                       |                  | Haukeland University Hospital           | Bergen                                   |                                                         | Norwegian Neonatal Network                                                                 |
|                                   |            |                       |                  | Fonna Health Trust                      | Haugesund                                |                                                         | Norwegian Neonatal Network                                                                 |
|                                   |            |                       |                  | Health Sunnmøre Trust                   | Ålesund                                  |                                                         | Norwegian Neonatal Network                                                                 |

## Supplemental Online Material: Nonauthor Collaborators

| *First Name and Middle Initial(s) | *Last Name | *Suffix (eg, Jr, III) | Academic Degrees | Institution                         | Location (city, state/province, country) | Role or Contribution, eg, chair, principal investigator | Group (if more than 1 Group listed in the byline) and/or Subgroup (eg, Steering Committee) |
|-----------------------------------|------------|-----------------------|------------------|-------------------------------------|------------------------------------------|---------------------------------------------------------|--------------------------------------------------------------------------------------------|
|                                   |            |                       |                  | Førde Health Trust                  | Førde                                    |                                                         | Norwegian Neonatal Network                                                                 |
|                                   |            |                       |                  | St. Olav University Hospital        | Trondheim                                |                                                         | Norwegian Neonatal Network                                                                 |
|                                   |            |                       |                  | Nord-Trøndelag Health Trust         | Levanger                                 |                                                         | Norwegian Neonatal Network                                                                 |
|                                   |            |                       |                  | Nordland Central Hospital           | Bodø                                     |                                                         | Norwegian Neonatal Network                                                                 |
|                                   |            |                       |                  | University Hospital of North Norway | Tromsø                                   |                                                         | Norwegian Neonatal Network                                                                 |
|                                   |            |                       |                  | Finnmark Health Trust               | Hammerfest                               |                                                         | Norwegian Neonatal Network                                                                 |
