# Supplementary material for: Neonatal Sepsis Episodes and Retinopathy of Prematurity in Very Preterm Infants
Source: PubMed Central journal article supplement (PMC11273231; doi:10.1001/jamanetworkopen.2024.23933), 2024-07-25
Supplement: jamanetwopen-e2423933-s003.pdf [file jamanetwopen-e2423933-s003.pdf]

## Data Sharing Statement

Glaser. Neonatal Sepsis Episodes and Retinopathy of Prematurity in Very Preterm Infants. *JAMA Netw Open*. Published online July 22, 2024. doi:10.1001/jamanetworkopen.2024.23933

### Data

**Data available:** Yes

**Data types:** Deidentified participant data

**How to access data:** Data sets are available from W.G. upon reasonable request.

**When available:** With publication

### Supporting Documents

**Document types:** None

### Additional Information

**Who can access the data:** To researchers and colleagues requesting the data.

**Types of analyses:** Data sets are available upon reasonable request.

**Mechanisms of data availability:** After approval of a proposal.
